# Supplementary material for: Dosimetric Comparisons between Proton Beam Therapy and Modern Photon Radiation Techniques for Stage I Non-Small Cell Lung Cancer According to Tumor Location
Source: MDPI journal article supplement (doi:10.3390/cancers13246356), 2021-12-17
Supplement: s1 [file s1]

**Supplementary Table S1.** Summary and comparison of dosimetric comparison of all cases (n = 42)

| PTV and OARs                      | PBT    |             | 3D-CRT |             | IMRT   |             | VMAT   |             | <i>p</i> value |                |                |
|-----------------------------------|--------|-------------|--------|-------------|--------|-------------|--------|-------------|----------------|----------------|----------------|
|                                   | Median | Range       | Median | Range       | Median | Range       | Median | Range       | PBT vs. 3D-CRT | PBT vs. IMRT   | PBT vs. VMAT   |
| PTV-SABR only (n = 33)            |        |             |        |             |        |             |        |             |                |                |                |
| CI                                | 1.21   | 1.0–1.5     | 1.19   | 1.0–1.3     | 1.02   | 1.0–1.1     | 1.04   | 1.0–1.1     | 0.276          | < <b>0.001</b> | < <b>0.001</b> |
| GI                                | 4.49   | 3.6–6.7     | 4.88   | 4.2–5.6     | 4.42   | 3.7–5.7     | 4.24   | 3.7–5.2     | 0.113          | 0.201          | <b>0.001</b>   |
| Dmax (%)                          | 116.72 | 107.0–134.2 | 122.18 | 116.7–133.1 | 130.58 | 122.0–137.2 | 130.4  | 123.1–136.0 | <b>0.015</b>   | < <b>0.001</b> | < <b>0.001</b> |
| Dmin (%)                          | 89.65  | 69.4–99.5   | 86.4   | 77.2–91.8   | 93.35  | 83.0–96.8   | 92.93  | 87.2–95.9   | 0.053          | <b>0.005</b>   | <b>0.037</b>   |
| PTV-Hypofractionated only (n = 9) |        |             |        |             |        |             |        |             |                |                |                |
| CI                                | 1.2    | 1.1–1.4     | 1.22   | 1.20–1.29   | 1.03   | 1.0–1.3     | 1.06   | 1.0–1.2     | 0.812          | <b>0.016</b>   | 0.078          |
| GI                                | 4.48   | 3.4–6.1     | 5.03   | 4.1–5.7     | 5.16   | 4.9–6.9     | 4.64   | 3.7–5.4     | 0.641          | 0.055          | 0.742          |
| Dmax (%)                          | 115.5  | 101.0–123.2 | 120.41 | 116.5–131.0 | 109.99 | 107.4–112.5 | 112.63 | 107.6–115.4 | <b>0.008</b>   | 0.203          | 0.496          |
| Dmin (%)                          | 86.77  | 51.1–96.8   | 86.77  | 59.6–89.6   | 93.33  | 75.2–95.2   | 90.03  | 76.1–98.5   | 0.912          | 0.074          | <b>0.019</b>   |
| Total lung (n = 42)               |        |             |        |             |        |             |        |             |                |                |                |
| V5 (%)                            | 10.79  | 3.6–18.7    | 16.85  | 6.0–28.7    | 16.38  | 6.0–31.2    | 16.16  | 4.8–27.8    | < <b>0.001</b> | < <b>0.001</b> | < <b>0.001</b> |
| V10 (%)                           | 8.5    | 2.8–16.2    | 11.6   | 4.1–19.9    | 10.93  | 4.3–19.2    | 10.82  | 4.0–19.8    | < <b>0.001</b> | < <b>0.001</b> | < <b>0.001</b> |
| V15 (%)                           | 7.06   | 2.2–12.8    | 8.5    | 2.7–16.3    | 7.69   | 2.9–16.2    | 7.45   | 3.0–14.2    | < <b>0.001</b> | < <b>0.001</b> | 0.065          |
| V20 (%)                           | 5.85   | 1.7–10.9    | 5.98   | 2.1–12.4    | 5.47   | 2.1–12.7    | 5.14   | 2.1–12.3    | <b>0.001</b>   | 0.864          | <b>0.017</b>   |
| V30 (%)                           | 3.72   | 1.2–8.1     | 3.33   | 1.2–8.2     | 3.24   | 0.9–7.7     | 3.03   | 1.0–8.7     | <b>0.027</b>   | <b>0.001</b>   | < <b>0.001</b> |
| V40 (%)                           | 2.26   | 0.8–5.7     | 2.02   | 0.7–4.2     | 1.89   | 0.5–4.2     | 1.85   | 0.5–3.8     | < <b>0.001</b> | < <b>0.001</b> | < <b>0.001</b> |
| Mean dose (Gy)                    | 2.99   | 0.1–5.4     | 4.33   | 1.7–7.3     | 4.07   | 1.8–6.8     | 3.95   | 1.7–7.4     | < <b>0.001</b> | < <b>0.001</b> | < <b>0.001</b> |
| Heart (n = 42)                    |        |             |        |             |        |             |        |             |                |                |                |
| V5 (%)                            | 0      | 0–5.3       | 4.37   | 0–70.5      | 7.02   | 0–72.8      | 8.64   | 0–64.0      | < <b>0.001</b> | < <b>0.001</b> | < <b>0.001</b> |
| V10 (%)                           | 0      | 0–4.0       | 0      | 0–39.3      | 0.22   | 0–51.4      | 0.45   | 0–41.5      | < <b>0.001</b> | < <b>0.001</b> | < <b>0.001</b> |

|                                  |       |           |       |           |       |           |       |           |                  |                  |                  |
|----------------------------------|-------|-----------|-------|-----------|-------|-----------|-------|-----------|------------------|------------------|------------------|
| V15 (%)                          | 0     | 0–3.1     | 0     | 0–25.1    | 0     | 0–29.4    | 0     | 0–20.5    | <b>0.004</b>     | <b>0.003</b>     | <b>&lt;0.001</b> |
| V20 (%)                          | 0     | 0–2.0     | 0     | 0–10.2    | 0     | 0–14.3    | 0     | 0–8.7     | <b>0.013</b>     | <b>0.008</b>     | <b>0.009</b>     |
| V30 (%)                          | 0     | 0–1.2     | 0     | 0–1.9     | 0     | 0–3.8     | 0     | 0–2.1     | 0.675            | 0.554            | 1                |
| V40 (%)                          | 0     | 0–0.5     | 0     | 0–0.3     | 0     | 0–1.0     | 0     | 0–0.6     | 0.789            | 1                | 1                |
| Mean dose (Gy)                   | 0     | 0–1.1     | 1.42  | 0–9.7     | 1.57  | 0–11.2    | 1.70  | 0–9.2     | <b>&lt;0.001</b> | <b>&lt;0.001</b> | <b>&lt;0.001</b> |
| Dmax (Gy)                        | 0.18  | 0–63.7    | 9.96  | 0.4–54.8  | 11.73 | 0.4–63.8  | 12.96 | 0–64.4    | <b>&lt;0.001</b> | <b>&lt;0.001</b> | <b>&lt;0.001</b> |
| Proximal bronchial tree (n = 33) |       |           |       |           |       |           |       |           |                  |                  |                  |
| Dmax (Gy)                        | 4.02  | 0–69.0    | 14.33 | 0.5–77.5  | 13.12 | 0.5–69.2  | 13.09 | 0.5–71.4  | <b>&lt;0.001</b> | <b>0.001</b>     | <b>0.001</b>     |
| D1cc (Gy)                        | 0.78  | 0–65.3    | 8.08  | 0.4–61.7  | 8.27  | 0.4–60.5  | 9.19  | 0.4–62.5  | <b>&lt;0.001</b> | <b>&lt;0.001</b> | <b>&lt;0.001</b> |
| Great vessel (n = 17)            |       |           |       |           |       |           |       |           |                  |                  |                  |
| Dmax (Gy)                        | 57.59 | 3.5–79.6  | 50.53 | 11.9–81.4 | 53.08 | 13.7–74.5 | 53.03 | 17.2–75.2 | 1                | 0.517            | 0.698            |
| Hilar major vessels (n = 25)     |       |           |       |           |       |           |       |           |                  |                  |                  |
| Dmax (Gy)                        | 52.17 | 0–78.3    | 51.5  | 0.6–81.7  | 53.31 | 0.6–77.5  | 55.62 | 0.5–78.8  | 0.916            | 0.182            | 0.300            |
| D1cc (Gy)                        | 26.81 | 0–66.6    | 25.12 | 0.4–70.9  | 25.82 | 0.4–63.3  | 28.16 | 0.3–64.7  | 0.691            | 0.508            | 0.381            |
| Spinal cord (n = 42)             |       |           |       |           |       |           |       |           |                  |                  |                  |
| Dmax (Gy)                        | 0.01  | 0–14.1    | 8.23  | 2.9–23.8  | 8.85  | 2.9–20.2  | 9.5   | 4.1–29.6  | <b>&lt;0.001</b> | <b>&lt;0.001</b> | <b>&lt;0.001</b> |
| Esophagus (n = 41)               |       |           |       |           |       |           |       |           |                  |                  |                  |
| Mean dose (Gy)                   | 0     | 0–1.4     | 2.33  | 0.5–16.0  | 2.29  | 0.6–16.9  | 2.72  | 0.7–17.6  | <b>&lt;0.001</b> | <b>&lt;0.001</b> | <b>&lt;0.001</b> |
| Dmax (Gy)                        | 0.08  | 0–17.5    | 9.26  | 3.8–29.8  | 11.37 | 5.0–36.9  | 11.76 | 5.2–26.8  | <b>&lt;0.001</b> | <b>&lt;0.001</b> | <b>&lt;0.001</b> |
| Chest wall (n = 38)              |       |           |       |           |       |           |       |           |                  |                  |                  |
| Dmax (Gy)                        | 55.69 | 31.0–75.9 | 60.31 | 28.9–91.2 | 60.24 | 29.1–77.1 | 61.15 | 34.4–77.0 | <b>&lt;0.001</b> | <b>0.005</b>     | <b>&lt;0.001</b> |
| D30cc (Gy)                       | 26.03 | 12.3–44.0 | 27.13 | 17.2–39.6 | 27.39 | 15.7–41.6 | 26.76 | 15.5–39.7 | <b>&lt;0.001</b> | <b>0.017</b>     | 0.072            |
| Skin (n = 38)                    |       |           |       |           |       |           |       |           |                  |                  |                  |
| Dmax (Gy)                        | 17.23 | 9.8–54.8  | 24.28 | 13.5–39.7 | 24.89 | 16.5–40.6 | 24.74 | 13.2–41.4 | <b>&lt;0.001</b> | <b>&lt;0.001</b> | <b>&lt;0.001</b> |

OARs, organs at risk; PBT, proton beam therapy; 3D-CRT, three-dimensional conformal radiotherapy; IMRT, intensity-modulated

radiotherapy; VMAT, volumetric modulated arc therapy, CGE, Cobalt Gray Equivalent; fx, fractions; PTV, planning target volume;

SABR, stereotactic ablative radiotherapy; CI, conformity index; GI, gradient index; Dmax, maximum dose; Dmin, minimum dose; V5-40; percentage volume of tissue receiving 5-40 Gy; D1cc, the dose delivered to 1 cubic centimeter volume; D30cc, the dose delivered to 30 cubic centimeter volume

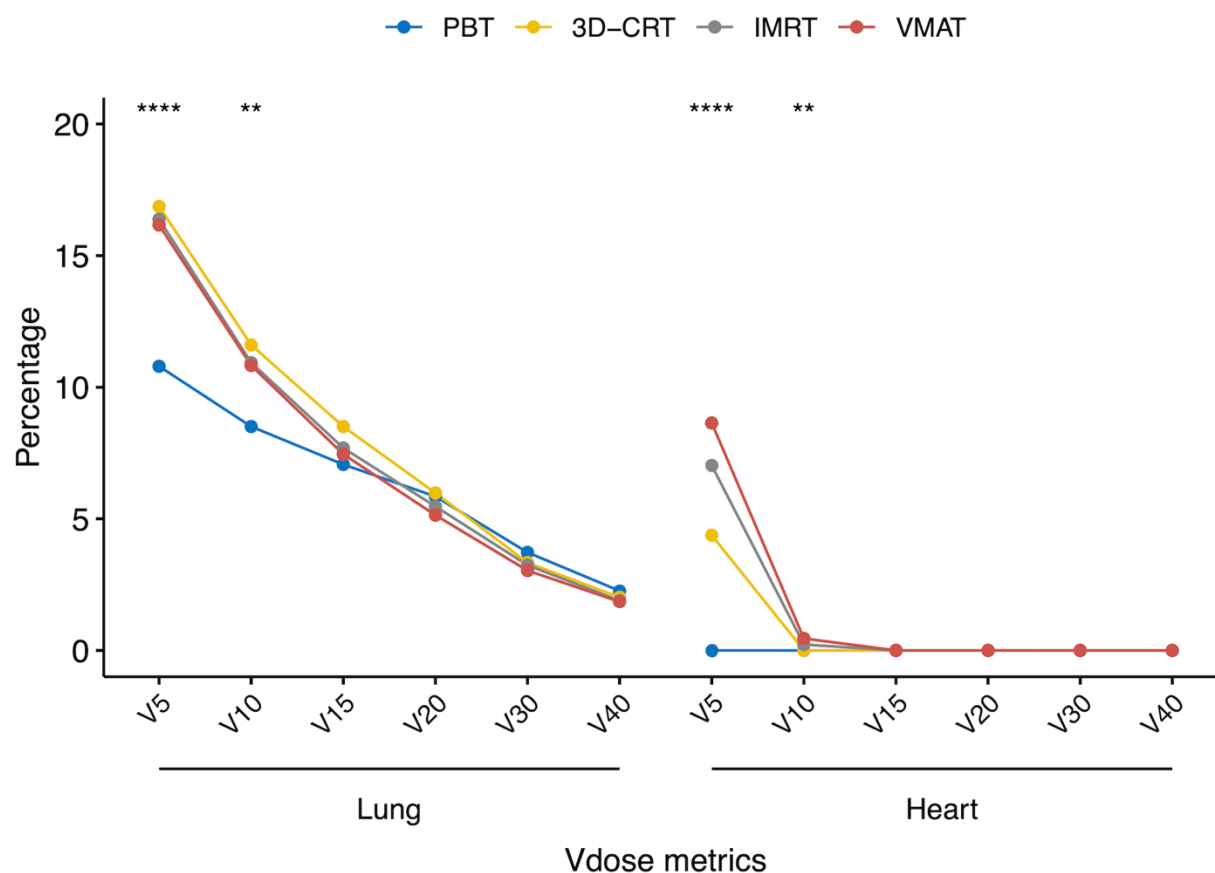

**Supplementary Figure S1.** The volume-dose metrics comparisons for the lung and heart according to different modalities in all cases (n = 42). The points are representing the median values of respective parameters. The Kruskal-Wallis test was used to determine the significant difference among the groups.

Not significant are not shown. \*  $\leq 0.05$ ; \*\*  $\leq 0.01$ ; \*\*\*  $\leq 0.001$ ; \*\*\*\*  $\leq 0.0001$ .

PBT, proton beam therapy; 3D-CRT, three-dimensional conformal radiotherapy; IMRT, intensity-modulated radiotherapy; VMRT, volumetric-modulated arc therapy; Vdose, volume dose; V5-40, percentage volume of tissue receiving 5-40 Gy.
